# Supplementary material for: Changes in characteristics and outcomes of critically ill COVID-19 patients in Tyrol (Austria) over 1 year
Source: Springer Nature journal article supplement (doi:10.1007/s00508-021-01945-5), 2021-10-18
Supplement: MOESM1 [file 19768064]

Electronic Supplementary Material

**Changes in characteristics and outcomes of critically ill COVID-19  
patients in Tyrol (Austria) over 1 year**

List of COVID-19 ICUs in Tyrol

Supplemental Tables 1-11

Supplemental Figure 1

List of COVID-19 intensive care units (ICUs) in Tyrol, Austria who participated in the Tyrolean COVID-19 Intensive Care Registry (Tyrol-CoV-ICU-Reg):

- Medical University Innsbruck, Innsbruck, Austria
  - First wave:
    - Medical ICU, Department of Internal Medicine
    - Neurosurgical ICU, Department of Neurosurgery
    - Transplantation ICU, Department of General and Surgical Intensive Care Medicine/Department of Anesthesia and Critical Care Medicine
    - Recovery room “OZA” (adapted as temporary ICU), Department of General and Surgical Intensive Care Medicine/Department of Anesthesia and Critical Care Medicine
    - Recovery room “KHZ” (adapted as temporary ICU), Department of General and Surgical Intensive Care Medicine/Department of Anesthesia and Critical Care Medicine
    - Pediatric Intensive Care Unit, Department of Pediatrics
  - Second wave:
    - Medical ICU, Department of Internal Medicine
    - Neurosurgical ICU, Department of Neurosurgery
    - Transplantation ICU, Department of General and Surgical Intensive Care Medicine/Department of Anesthesia and Critical Care Medicine
    - General surgery ICU, Department of General and Surgical Intensive Care Medicine/Department of Anesthesia and Critical Care Medicine
    - Cardiac surgery ICU, Department of General and Surgical Intensive Care Medicine/Department of Anesthesia and Critical Care Medicine
    - Pediatric Intensive Care Unit, Department of Pediatrics
- Hospital Hall, Hall, Austria
  - ICU, Department of Anesthesia and Intensive Care Medicine
- Hospital Kufstein, Kufstein, Austria
  - ICU, Department of Anesthesia and Intensive Care Medicine
- Hospital Lienz, Lienz, Austria
  - ICU, Department of Anesthesia and Intensive Care Medicine
- Hospital Reutte, Reutte, Austria
  - ICU, Department of Anesthesia and Intensive Care Medicine

- Hospital Schwaz, Schwaz, Austria
  - ICU, Department of Anesthesia and Critical Care Medicine
- Hospital St. Johann i.T., St. Johann in Tyrol, Austria
  - ICU, Department of Anesthesia and Intensive Care Medicine
- Hospital Zams
  - Medical ICU, Department of Internal Medicine
  - Surgical ICU, Department of Anesthesiology and Critical Care Medicine

**Supplemental Table 1** Baseline characteristics of 4 critically ill COVID-19 pediatric patients

|                                                                  | Overall             |
|------------------------------------------------------------------|---------------------|
| n                                                                | 4                   |
| Sex: male/female (%)                                             | 3/1 (75.0/25.0)     |
| Age, years median (IQR)                                          | 7.00 (2.25-12.50)   |
| <b>Comorbidities</b>                                             |                     |
| Hypertension (%)                                                 | 0 (0)               |
| Cardiovascular (%)                                               | 0 (0)               |
| Diabetes (%)                                                     |                     |
| Prediabetes                                                      | 0 (0)               |
| DM Type I                                                        | 0 (0)               |
| DM Type II                                                       | 0 (0)               |
| DM (other Type)                                                  | 0 (0)               |
| Renal (%)                                                        | 0 (0)               |
| Neurological (%)                                                 | 0 (0)               |
| Liver (%)                                                        | 0 (0)               |
| Hematological malignancy (%)                                     | 0 (0)               |
| Immunosuppression (%)                                            | 0 (0)               |
| Nonhematological malignancy (%)                                  | 0 (0)               |
| COPD (%)                                                         | 0 (0)               |
| Asthma (%)                                                       | 0 (0)               |
| Respiratory - other (%)                                          | 0 (0)               |
| Overweight (BMI $\geq$ 25) (%)                                   | 0 (0)               |
| Obesity (BMI $\geq$ 30) (%)                                      | 0 (0)               |
| No known comorbidity (%)                                         | 4 (100.0)           |
| Number of comorbidities, n                                       | 0.00 (0.00-0.00)    |
| BMI, kg/m <sup>2</sup> median (IQR)                              | 19.82 (15.12-23.63) |
| HbA1c, % median (IQR)                                            | 5.50 (5.45-5.85)    |
| <b>Risk factors</b>                                              |                     |
| Active smoking (%)                                               | 0 (0)               |
| Previous smoking (%)                                             | 0 (0)               |
| Patient from nursing home (%)                                    | 0 (0)               |
| Frailty                                                          |                     |
| Fully independent daily living (%)                               | 2 (66.7)            |
| Pre-frail (%)                                                    | 0 (0.0)             |
| Frail (%)                                                        | 1 (33.3)            |
| COVID-19 primary reason for hospital admission (%)               | 1 (25.0)            |
| COVID-19 typical findings in chest x-ray (%)                     | 2 (50.0)            |
| COVID-19 typical findings in computed tomography (%)             | 0 (0)               |
| SAPS III, median (IQR)                                           | 52.50 (51.25-53.75) |
| Time from symptom onset to hospital admission, days median (IQR) | 5.50 (3.75-6.25)    |
| Time from symptom onset to ICU admission, days median (IQR)      | 6.00 (4.50-6.50)    |

IQR – interquartile range, DM – diabetes mellitus, COPD – chronic obstructive pulmonary disease, BMI – body mass index, HbA1c – glycated hemoglobin, SOFA – sequential organ failure assessment, SAPS – simplified acute physiology score, ICU – intensive care unit

**Supplemental Table 2** Treatment of 4 critically ill COVID-19 pediatric patients

|                            | Overall          |
|----------------------------|------------------|
| n                          | 4                |
| IMV (%)                    | 1 (25.0)         |
| NIV before IMV (%)         | 1 (100.0)        |
| HFNC before IMV (%)        | 1 (100.0)        |
| NIV (never IMV) (%)        | 0 (0)            |
| HFNC (never IMV) (%)       | 1 (33.3)         |
| Prone Positioning (%)      | 0 (0)            |
| Neuromuscular blockade (%) |                  |
| no neuromuscular blockade  | 4 (100.0)        |
| Vasopressors (%)           | 2 (50.0)         |
| RRT (%)                    | 0 (0)            |
| vv-ECMO (%)                | 0 (0)            |
| Days on IMV, median (IQR)  | 0.00 (0.00-0.00) |
| Days on NIV, median (IQR)  | 4.00 (4.00-4.00) |
| Days on HFNC, median (IQR) | 2.50 (1.75-3.25) |
| Corticosteroids (%)        | 3 (75.0)         |

IQR – interquartile range, IMV – invasive mechanical ventilation, NIV – noninvasive ventilation, HFNC- high flow nasal cannula, RRT – renal replacement therapy, vv-ECMO – veno-venous extracorporeal membrane oxygenation,

**Supplemental Table 3** Outcome of 4 critically ill COVID-19 pediatric patients

|                                 | Overall          |
|---------------------------------|------------------|
| n                               | 4                |
| Death in ICU (%)                | 0 (0)            |
| Death in Hospital (%)           | 0 (0)            |
| ICU LOS, days median (IQR)      | 4.00 (3.75-4.00) |
| Hospital LOS, days median (IQR) | 7.00 (5.50-8.50) |
| AKI (%)                         |                  |
| No AKI                          | 4 (100.0)        |
| KDIGO I                         | 0 (0)            |
| KDIGO II                        | 0 (0)            |
| KDIGO III                       | 0 (0)            |
| Treatment limitations (%)       | 0 (0)            |
| No CPR (%)                      | 0 (0)            |
| No IMV (%)                      | 0 (0)            |
| No ECMO (%)                     | 0 (0)            |
| other (%)                       | 0 (0)            |
| Best supportive care (%)        | 0 (0)            |

IQR – interquartile range, ICU – intensive care unit, AKI – acute kidney injury, KDIGO – kidney disease: improving global outcomes, LOS – length of stay, CPR – cardiopulmonary resuscitation

**Supplemental Table 4** Baseline characteristics of 508 critically ill COVID-19 patients grouped by receipt of invasive mechanical ventilation

|                                                                  | Overall             | No IMV              | IMV                 | P value |
|------------------------------------------------------------------|---------------------|---------------------|---------------------|---------|
| n                                                                | 508                 | 233                 | 274                 |         |
| Sex: male/female (%)                                             | 356/152 (70.1/29.9) | 159/74 (68.2/31.8)  | 197/77 (71.9/28.1)  | 0.424   |
| Age, years median (IQR)                                          | 71.00 (60.00-78.00) | 70.00 (61.00-78.00) | 71.00 (60.00-78.00) | 0.855   |
| <b>Comorbidities</b>                                             |                     |                     |                     |         |
| Hypertension (%)                                                 | 327 (64.4)          | 155 (66.5)          | 171 (62.4)          | 0.384   |
| Cardiovascular (%)                                               | 217 (42.7)          | 101 (43.3)          | 116 (42.3)          | 0.889   |
| Diabetes (%)                                                     |                     |                     |                     | 0.680   |
| Prediabetes                                                      | 15 (3.0)            | 8 (3.4)             | 7 (2.6)             |         |
| DM Type I                                                        | 5 (1.0)             | 3 (1.3)             | 2 (0.7)             |         |
| DM Type II                                                       | 114 (22.4)          | 56 (24.0)           | 58 (21.2)           |         |
| DM (other Type)                                                  | 1 (0.2)             | 0 (0.0)             | 1 (0.4)             |         |
| Renal (%)                                                        | 108 (21.3)          | 46 (19.7)           | 62 (22.6)           | 0.495   |
| Neurological (%)                                                 | 75 (14.8)           | 34 (14.6)           | 41 (15.0)           | 1.000   |
| Liver (%)                                                        | 38 (7.5)            | 16 (6.9)            | 22 (8.0)            | 0.744   |
| Hematological malignancy (%)                                     | 26 (5.1)            | 16 (6.9)            | 10 (3.6)            | 0.151   |
| Immunosuppression (%)                                            | 36 (7.1)            | 15 (6.4)            | 21 (7.7)            | 0.717   |
| Nonhematological malignancy (%)                                  | 40 (7.9)            | 20 (8.6)            | 20 (7.3)            | 0.701   |
| COPD (%)                                                         | 70 (13.8)           | 38 (16.3)           | 32 (11.7)           | 0.169   |
| Asthma (%)                                                       | 21 (4.1)            | 9 (3.9)             | 12 (4.4)            | 0.946   |
| Respiratory - other (%)                                          | 41 (8.1)            | 22 (9.4)            | 19 (6.9)            | 0.385   |
| Overweight (BMI $\geq$ 25) (%)                                   | 363 (74.1)          | 162 (73.3)          | 200 (74.6)          | 0.819   |
| Obesity (BMI $\geq$ 30) (%)                                      | 150 (30.6)          | 72 (32.6)           | 77 (28.7)           | 0.411   |
| No known comorbidity (%)                                         | 47 (9.6)            | 18 (8.2)            | 29 (10.8)           | 0.407   |
| Number of comorbidities, n median (IQR)                          | 2.00 (1.00-4.00)    | 3.00 (1.00-4.00)    | 2.00 (1.00-4.00)    | 0.189   |
| BMI, kg/m <sup>2</sup> median (IQR)                              | 27.52 (24.98-30.86) | 27.49 (24.96-31.05) | 27.51 (24.98-30.75) | 0.863   |
| HbA1c, % median (IQR)                                            | 6.30 (5.90-6.80)    | 6.29 (5.90-7.00)    | 6.30 (5.90-6.80)    | 0.803   |
| <b>Risk factors</b>                                              |                     |                     |                     |         |
| Active smoking (%)                                               | 43 (9.9)            | 18 (8.7)            | 24 (10.5)           | 0.629   |
| Previous smoking (%)                                             | 116 (28.2)          | 52 (27.5)           | 63 (28.4)           | 0.933   |
| Patient from nursing home (%)                                    | 14 (2.8)            | 7 (3.0)             | 7 (2.6)             | 0.963   |
| Frailty                                                          |                     |                     |                     | 0.009   |
| Fully independent daily living (%)                               | 422 (84.4)          | 182 (79.1)          | 239 (88.8)          |         |
| Pre-frail (%)                                                    | 70 (14.0)           | 42 (18.3)           | 28 (10.4)           |         |
| Frail (%)                                                        | 8 (1.6)             | 6 (2.6)             | 2 (0.7)             |         |
| COVID-19 primary reason for hospital admission (%)               | 422 (83.1)          | 185 (79.4)          | 236 (86.1)          | 0.058   |
| COVID-19 typical findings in chest x-ray (%)                     | 458 (92.0)          | 198 (88.0)          | 259 (95.2)          | 0.005   |
| COVID-19 typical findings in computed tomography (%)             | 256 (87.7)          | 102 (87.2)          | 153 (87.9)          | 0.993   |
| SOFA Score, median (IQR)                                         | 5.00 (4.00-8.00)    | 4.00 (3.00-6.00)    | 7.00 (4.00-9.00)    | <0.001  |
| SAPS III Score, median (IQR)                                     | 56.00 (49.00-64.00) | 52.00 (47.00-62.00) | 58.00 (51.00-66.00) | <0.001  |
| Time from symptom onset to hospital admission, days median (IQR) | 6.00 (3.00-9.00)    | 6.00 (3.00-9.00)    | 7.00 (4.00-10.00)   | 0.048   |
| Time from symptom onset to ICU admission, days median (IQR)      | 8.00 (5.00-11.00)   | 8.00 (5.00-11.00)   | 8.00 (6.00-12.00)   | 0.067   |

IQR – interquartile range, DM – diabetes mellitus, COPD – chronic obstructive pulmonary disease, BMI – body mass index, HbA1c – glycated hemoglobin, SOFA – sequential organ failure assessment, SAPS – simplified acute physiology score, ICU – intensive care unit

**Supplemental Table 5 Treatment grouped by receipt of invasive mechanical ventilation**

|                                           | Overall             | No IMV           | IMV                 | P value |
|-------------------------------------------|---------------------|------------------|---------------------|---------|
| n                                         | 508                 | 233              | 274                 |         |
| IMV (%)                                   | 274 (54.0)          | 0 (0.0)          | 274 (100.0)         | <0.001  |
| NIV before IMV (%)                        | 202 (74.8)          | 0 (NA)           | 202 (75.1)          | NA      |
| HFNC before IMV (%)                       | 114 (42.2)          | 0 (NA)           | 114 (42.4)          | NA      |
| NIV (never IMV) (%)                       | 194 (82.9)          | 194 (83.3)       | 0 (NA)              | NA      |
| HFNC (never IMV) (%)                      | 123 (52.8)          | 123 (53.0)       | 0 (NA)              | NA      |
| Prone Positioning (%)                     | 234 (46.2)          | 30 (12.9)        | 203 (74.1)          | <0.001  |
| Neuromuscular blockade (%)                |                     |                  |                     | <0.001  |
| no neuromuscular blockade                 | 393 (77.7)          | 231 (100.0)      | 162 (59.1)          |         |
| intermittent neuromuscular blockade       | 99 (19.6)           | 0 (0.0)          | 98 (35.8)           |         |
| continuous neuromuscular blockade         | 14 (2.8)            | 0 (0.0)          | 14 (5.1)            |         |
| Vasopressors (%)                          | 274 (54.3)          | 33 (14.2)        | 241 (88.6)          | <0.001  |
| RRT (%)                                   | 69 (13.6)           | 5 (2.2)          | 64 (23.4)           | <0.001  |
| vv-ECMO (%)                               | 20 (3.9)            | 0 (0.0)          | 20 (7.3)            | <0.001  |
| Days on IMV, median (IQR)                 | 13.00 (7.00-22.00)  | NA               | 13.00 (7.00-22.00)  | NA      |
| Days on NIV, median (IQR)                 | 3.00 (1.00-6.00)    | 5.00 (2.00-7.00) | 2.00 (1.00-5.00)    | <0.001  |
| Days on NHF, median (IQR)                 | 3.00 (1.00-6.00)    | 5.00 (2.00-7.00) | 2.00 (1.00-3.00)    | <0.001  |
| Days with Prone Positioning, median (IQR) | 3.00 (2.00-6.00)    | 3.00 (1.00-4.00) | 3.00 (2.00-6.50)    | 0.061   |
| Days on RRT, median (IQR)                 | 8.00 (3.00-23.00)   | 1.00 (1.00-1.00) | 10.00 (3.00-24.25)  | 0.001   |
| Days on ECMO, median (IQR)                | 23.50 (13.50-29.25) | NA               | 23.50 (13.50-29.25) | NA      |
| Corticosteroids (%)                       | 384 (76.2)          | 175 (76.1)       | 208 (76.2)          | 1.000   |

IQR – interquartile range, IMV – invasive mechanical ventilation, NIV – noninvasive ventilation, HFNC – high flow nasal cannula, RRT – renal replacement therapy, vv-ECMO – veno-venous extracorporeal membrane oxygenation, NA – Not available



**Supplemental Table 6 Outcome grouped by receipt of invasive mechanical ventilation**

|                                  | Overall             | No IMV             | IMV                 | P value |
|----------------------------------|---------------------|--------------------|---------------------|---------|
| n                                | 508                 | 233                | 274                 |         |
| Death in ICU (%)                 | 139 (27.4)          | 40 (17.2)          | 98 (35.8)           | <0.001  |
| Death in Hospital (%)            | 158 (31.1)          | 50 (21.5)          | 107 (39.1)          | <0.001  |
| Hospital LOS, days median (IQR)  | 21.00 (13.00-35.00) | 15.00 (9.00-23.00) | 28.00 (19.00-44.00) | <0.001  |
| ICU LOS, days median (IQR)       | 11.00 (5.00-22.00)  | 6.00 (3.00-9.00)   | 20.00 (13.00-32.00) | <0.001  |
| AKI (%)                          |                     |                    |                     | <0.001  |
| No AKI                           | 343 (68.1)          | 208 (89.7)         | 134 (49.4)          |         |
| KDIGO I                          | 52 (10.3)           | 11 (4.7)           | 41 (15.1)           |         |
| KDIGO II                         | 31 (6.2)            | 5 (2.2)            | 26 (9.6)            |         |
| KDIGO III                        | 78 (15.5)           | 8 (3.4)            | 70 (25.8)           |         |
| <b>Treatment limitations (%)</b> | 137 (27.0)          | 58 (24.9)          | 79 (28.8)           | 0.371   |
| No CPR (%)                       | 107 (21.1)          | 48 (20.6)          | 59 (21.5)           | 0.883   |
| No IMV (%)                       | 56 (11.0)           | 51 (21.9)          | 5 (1.8)             | <0.001  |
| No ECMO (%)                      | 87 (17.1)           | 37 (15.9)          | 50 (18.2)           | 0.557   |
| other (%)                        | 71 (14.0)           | 33 (14.2)          | 38 (13.9)           | 1.000   |
| Best supportive care (%)         | 75 (14.8)           | 27 (11.6)          | 48 (17.5)           | 0.080   |

IQR – interquartile range, ICU- intensive care unit, AKI – acute kidney injury, KDIGO – kidney disease: improving global outcomes, LOS – length of stay, CPR – cardiopulmonary resuscitation, IMV – invasive mechanical ventilation, ECMO - extracorporeal membrane oxygenation

**Supplemental Table 7** Baseline characteristics grouped by hospital death

|                                                                  | Overall             | Survivors           | Nonsurvivors        | P value |
|------------------------------------------------------------------|---------------------|---------------------|---------------------|---------|
| n                                                                | 508                 | 350                 | 158                 |         |
| Sex: male/female (%)                                             | 356/152 (70.1/29.9) | 242/108 (69.1/30.9) | 114/44 (72.2/27.8)  | 0.561   |
| Age, years median (IQR)                                          | 71.00 (60.00-78.00) | 66.00 (57.00-75.00) | 77.00 (71.00-81.00) | <0.001  |
| <b>Comorbidities</b>                                             |                     |                     |                     |         |
| Hypertension (%)                                                 | 327 (64.4)          | 212 (60.6)          | 115 (72.8)          | 0.010   |
| Cardiovascular (%)                                               | 217 (42.7)          | 125 (35.7)          | 92 (58.2)           | <0.001  |
| Diabetes (%)                                                     |                     |                     |                     | 0.154   |
| Prediabetes                                                      | 15 (3.0)            | 6 (1.7)             | 9 (5.7)             |         |
| DM Type I                                                        | 5 (1.0)             | 3 (0.9)             | 2 (1.3)             |         |
| DM Type II                                                       | 114 (22.4)          | 80 (22.9)           | 34 (21.5)           |         |
| DM (other Type)                                                  | 1 (0.2)             | 1 (0.3)             | 0 (0.0)             |         |
| Renal (%)                                                        | 108 (21.3)          | 55 (15.7)           | 53 (33.5)           | <0.001  |
| Neurological (%)                                                 | 75 (14.8)           | 43 (12.3)           | 32 (20.3)           | 0.027   |
| Liver (%)                                                        | 38 (7.5)            | 20 (5.7)            | 18 (11.4)           | 0.038   |
| Hematological malignancy (%)                                     | 26 (5.1)            | 12 (3.4)            | 14 (8.9)            | 0.019   |
| Immunosuppression (%)                                            | 36 (7.1)            | 24 (6.9)            | 12 (7.6)            | 0.910   |
| Nonhematological malignancy (%)                                  | 40 (7.9)            | 23 (6.6)            | 17 (10.8)           | 0.143   |
| COPD (%)                                                         | 70 (13.8)           | 40 (11.4)           | 30 (19.0)           | 0.032   |
| Asthma (%)                                                       | 21 (4.1)            | 17 (4.9)            | 4 (2.5)             | 0.328   |
| Respiratory - other (%)                                          | 41 (8.1)            | 26 (7.4)            | 15 (9.5)            | 0.539   |
| Overweight (BMI $\geq$ 25) (%)                                   | 363 (74.1)          | 254 (75.8)          | 109 (70.3)          | 0.238   |
| Obesity (BMI $\geq$ 30) (%)                                      | 150 (30.6)          | 109 (32.5)          | 41 (26.5)           | 0.210   |
| No known comorbidity (%)                                         | 47 (9.6)            | 43 (12.8)           | 4 (2.6)             | 0.001   |
| Number of comorbidities, n median (IQR)                          | 2.00 (1.00-4.00)    | 2.00 (1.00-3.00)    | 3.00 (2.00-4.00)    | <0.001  |
| BMI, kg/m <sup>2</sup> median (IQR)                              | 27.52 (24.98-30.86) | 27.64 (25.10-31.12) | 27.34 (24.52-30.56) | 0.351   |
| HbA1c, % median (IQR)                                            | 6.30 (5.90-6.80)    | 6.30 (5.80-6.80)    | 6.30 (5.90-6.93)    | 0.535   |
| <b>Risk factors</b>                                              |                     |                     |                     |         |
| Active smoking (%)                                               | 43 (9.9)            | 28 (9.4)            | 15 (10.8)           | 0.785   |
| Previous smoking (%)                                             | 116 (28.2)          | 78 (28.1)           | 38 (28.4)           | 1.000   |
| Patient from nursing home (%)                                    | 14 (2.8)            | 7 (2.0)             | 7 (4.5)             | 0.213   |
| Frailty                                                          |                     |                     |                     | <0.001  |
| Fully independent daily living (%)                               | 422 (84.4)          | 311 (89.9)          | 111 (72.1)          |         |
| Pre-frail (%)                                                    | 70 (14.0)           | 33 (9.5)            | 37 (24.0)           |         |
| Frail (%)                                                        | 8 (1.6)             | 2 (0.6)             | 6 (3.9)             |         |
| COVID-19 primary reason for hospital admission (%)               | 422 (83.1)          | 289 (82.6)          | 133 (84.2)          | 0.750   |
| COVID-19 typical findings in chest x-ray (%)                     | 458 (92.0)          | 311 (90.7)          | 147 (94.8)          | 0.160   |
| COVID-19 typical findings in computed tomography (%)             | 256 (87.7)          | 180 (88.2)          | 76 (86.4)           | 0.801   |
| SOFA Score, median (IQR)                                         | 5.00 (4.00-8.00)    | 4.00 (3.00-7.00)    | 7.00 (4.00-9.00)    | <0.001  |
| SAPS III Score, median (IQR)                                     | 56.00 (49.00-64.00) | 53.00 (47.00-60.00) | 62.00 (55.00-70.00) | <0.001  |
| Time from symptom onset to hospital admission, days median (IQR) | 6.00 (3.00-9.00)    | 7.00 (4.00-10.00)   | 5.00 (3.00-8.00)    | <0.001  |
| Time from symptom onset to ICU admission, days median (IQR)      | 8.00 (5.00-11.00)   | 9.00 (6.00-12.00)   | 7.00 (4.00-10.00)   | 0.001   |

IQR – interquartile range, DM – diabetes mellitus, COPD – chronic obstructive pulmonary disease, BMI – body mass index, HbA1c – glycated hemoglobin, SOFA – sequential organ failure assessment, SAPS – simplified acute physiology score, ICU – intensive care unit

**Supplemental Table 8 Treatment grouped by hospital death**

|                                           | Overall             | Survivors           | Nonsurvivors        | P value |
|-------------------------------------------|---------------------|---------------------|---------------------|---------|
| n                                         | 508                 | 350                 | 158                 |         |
| IMV (%)                                   | 274 (54.0)          | 167 (47.7)          | 107 (68.2)          | <0.001  |
| NIV before IMV (%)                        | 202 (74.8)          | 120 (73.6)          | 82 (76.6)           | 0.678   |
| HFNC before IMV (%)                       | 114 (42.2)          | 70 (42.9)           | 44 (41.1)           | 0.864   |
| NIV (never IMV) (%)                       | 194 (82.9)          | 150 (82.0)          | 44 (86.3)           | 0.608   |
| HFNC (never IMV) (%)                      | 123 (52.8)          | 96 (52.7)           | 27 (52.9)           | 1.000   |
| Prone Positioning (%)                     | 234 (46.2)          | 141 (40.4)          | 93 (58.9)           | <0.001  |
| Neuromuscular blockade (%)                |                     |                     |                     | <0.001  |
| no neuromuscular blockade                 | 393 (77.7)          | 288 (82.8)          | 105 (66.5)          |         |
| intermittent neuromuscular blockade       | 99 (19.6)           | 53 (15.2)           | 46 (29.1)           |         |
| continuous neuromuscular blockade         | 14 (2.8)            | 7 (2.0)             | 7 (4.4)             |         |
| Vasopressors (%)                          | 274 (54.3)          | 157 (44.9)          | 117 (75.5)          | <0.001  |
| RRT (%)                                   | 69 (13.6)           | 32 (9.2)            | 37 (23.6)           | <0.001  |
| vv-ECMO (%)                               | 20 (3.9)            | 12 (3.4)            | 8 (5.1)             | 0.532   |
| Days on IMV, median (IQR)                 | 13.00 (7.00-22.00)  | 12.00 (7.00-21.00)  | 14.00 (6.25-23.00)  | 0.844   |
| Days on NIV, median (IQR)                 | 3.00 (1.00-6.00)    | 4.00 (2.00-7.00)    | 2.00 (1.00-4.00)    | <0.001  |
| Days on NHF, median (IQR)                 | 3.00 (1.00-6.00)    | 3.00 (1.00-6.00)    | 2.00 (1.00-3.50)    | 0.006   |
| Days with Prone Positioning, median (IQR) | 3.00 (2.00-6.00)    | 3.00 (1.00-5.00)    | 4.00 (2.00-8.00)    | 0.003   |
| Days on RRT, median (IQR)                 | 8.00 (3.00-23.00)   | 14.00 (5.25-25.25)  | 4.00 (2.00-11.00)   | 0.033   |
| Days on ECMO, median (IQR)                | 23.50 (13.50-29.25) | 18.00 (11.75-29.75) | 26.50 (23.25-28.50) | 0.279   |
| Corticosteroids (%)                       | 384 (76.2)          | 255 (73.5)          | 129 (82.2)          | 0.045   |

IQR – interquartile range, IMV – invasive mechanical ventilation, NIV – noninvasive ventilation, HFNC- high flow nasal cannula, RRT – renal replacement therapy, vv-ECMO – veno-venous extracorporeal membrane oxygenation

**Supplemental Table 9 Outcome grouped by hospital death**

|                                  | Overall             | Survivors           | Nonsurvivors       | P value |
|----------------------------------|---------------------|---------------------|--------------------|---------|
| n                                | 508                 | 350                 | 158                |         |
| Death in ICU (%)                 | 139 (27.4)          | 0 (0.0)             | 139 (88.0)         | <0.001  |
| Death in Hospital (%)            | 158 (31.1)          | 0 (0.0)             | 158 (100.0)        | <0.001  |
| Hospital LOS, days median (IQR)  | 21.00 (13.00-35.00) | 23.00 (15.00-40.00) | 17.00 (8.00-27.00) | <0.001  |
| ICU LOS, days median (IQR)       | 11.00 (5.00-22.00)  | 11.00 (5.00-22.00)  | 10.00 (4.00-22.00) | 0.478   |
| AKI (%)                          |                     |                     |                    | <0.001  |
| No AKI                           | 343 (68.1)          | 269 (77.3)          | 74 (47.4)          |         |
| KDIGO I                          | 52 (10.3)           | 36 (10.3)           | 16 (10.3)          |         |
| KDIGO II                         | 31 (6.2)            | 16 (4.6)            | 15 (9.6)           |         |
| KDIGO III                        | 78 (15.5)           | 27 (7.8)            | 51 (32.7)          |         |
| <b>Treatment limitations (%)</b> | 137 (27.0)          | 26 (7.4)            | 111 (70.3)         | <0.001  |
| No CPR (%)                       | 107 (21.1)          | 22 (6.3)            | 85 (53.8)          | <0.001  |
| No IMV (%)                       | 56 (11.0)           | 13 (3.7)            | 43 (27.2)          | <0.001  |
| No ECMO (%)                      | 87 (17.1)           | 20 (5.7)            | 67 (42.4)          | <0.001  |
| other (%)                        | 71 (14.0)           | 12 (3.4)            | 59 (37.3)          | <0.001  |
| Best supportive care (%)         | 75 (14.8)           | 1 (0.3)             | 74 (46.8)          | <0.001  |

IQR – interquartile range, ICU – intensive care unit, AKI – acute kidney injury, KDIGO – kidney disease: improving global outcomes, LOS – length of stay, CPR – cardiopulmonary resuscitation, IMV – invasive mechanical ventilation, ECMO - extracorporeal membrane oxygenation

**Supplemental Table 10** Baseline characteristics before and after propensity score matching

|                                 | Before propensity score matching |                     |                         | After propensity score matching |                     |                         |
|---------------------------------|----------------------------------|---------------------|-------------------------|---------------------------------|---------------------|-------------------------|
|                                 | First wave (n=105)               | Second wave (n=378) | Standardized Difference | First wave (n=105)              | Second wave (n=105) | Standardized Difference |
| Sex: male/female (%)            | 75/30 (71.4/28.6)                | 262/116 (69.3/30.7) | 0.046                   | 75/30 (71.4/28.6)               | 74/31 (70.5/29.5)   | 0.021                   |
| Age, years median (IQR)         | 64.00 (54.00-75.00)              | 72.00 (61.00-78.00) | 0.394                   | 64.00 (54.00-75.00)             | 68.00 (56.00-76.00) | 0.050                   |
| <b>Comorbidities</b>            |                                  |                     |                         |                                 |                     |                         |
| Hypertension (%)                | 71 (67.6)                        | 243 (64.3)          | 0.070                   | 71 (67.6)                       | 75 (71.4)           | 0.083                   |
| Cardiovascular (%)              | 45 (42.9)                        | 159 (42.1)          | 0.016                   | 45 (42.9)                       | 55 (52.4)           | 0.192                   |
| Diabetes (%)                    |                                  |                     | 0.284                   |                                 |                     | 0.181                   |
| Prediabetes                     | 2 (1.9)                          | 12 (3.2)            |                         | 85 (81.0)                       | 90 (85.7)           |                         |
| DM Type I                       | 1 (1.0)                          | 4 (1.1)             |                         | 2 (1.9)                         | 2 (1.9)             |                         |
| DM Type II                      | 16 (15.2)                        | 92 (24.3)           |                         | 1 (1.0)                         | 1 (1.0)             |                         |
| DM (other Type)                 | 1 (1.0)                          | 0 (0.0)             |                         | 16 (15.2)                       | 12 (11.4)           |                         |
| Renal (%)                       | 21 (20.0)                        | 81 (21.4)           | 0.035                   | 21 (20.0)                       | 23 (21.9)           | 0.047                   |
| Neurological (%)                | 11 (10.5)                        | 60 (15.9)           | 0.0160                  | 11 (10.5)                       | 11 (10.5)           | <0.001                  |
| Liver (%)                       | 7 (6.7)                          | 28 (7.4)            | 0.029                   | 7 (6.7)                         | 4 (3.8)             | 0.129                   |
| Hematological malignancy (%)    | 3 (2.9)                          | 21 (5.6)            | 0.135                   | 3 (2.9)                         | 7 (6.7)             | 0.180                   |
| Immunosuppression (%)           | 11 (10.5)                        | 25 (6.6)            | 0.138                   | 11 (10.5)                       | 10 (9.5)            | 0.032                   |
| Nonhematological malignancy (%) | 5 (4.8)                          | 29 (7.7)            | 0.121                   | 5 (4.8)                         | 5 (4.8)             | <0.001                  |
| COPD (%)                        | 14 (13.3)                        | 51 (13.5)           | 0.5                     | 14 (13.3)                       | 13 (12.4)           | 0.028                   |
| Asthma (%)                      | 7 (6.7)                          | 13 (3.4)            | 0.148                   | 7 (6.7)                         | 5 (4.8)             | 0.082                   |

|                                                              |                     |                     |       |                     |                     |        |
|--------------------------------------------------------------|---------------------|---------------------|-------|---------------------|---------------------|--------|
| Respiratory - other (%)                                      | 13 (12.4)           | 27 (7.1)            | 0.177 | 13 (12.4)           | 12 (11.4)           | 0.029  |
| No known comorbidity (%)                                     | 15 (14.3)           | 34 (9.0)            | 0.166 | 15 (14.3)           | 9 (8.6)             | 0.180  |
| BMI, median (IQR))                                           | 27.18 (25.13-29.76) | 27.77 (25.10-30.86) | 0.174 | 27.18 (25.13-29.76) | 27.47 (24.98-29.63) | 0.014  |
| <b>Risk factors</b>                                          |                     |                     |       |                     |                     |        |
| Active smoking (%)                                           | 11 (10.5)           | 30 (7.9)            | 0.088 | 11 (10.5)           | 12 (11.4)           | 0.030  |
| Previous smoking (%)                                         | 25 (23.8)           | 86 (22.8)           | 0.025 | 25 (23.8)           | 26 (24.8)           | 0.022  |
| Patient from nursing home (%)                                | 0 (0.0)             | 13 (3.4)            | 0.267 | 105 (100.0)         | 105 (100.0)         | <0.001 |
| Frailty                                                      | 15 (14.3)           | 57 (15.1)           | 0.022 | 15 (14.3)           | 13 (12.4)           | 0.056  |
| COVID-19 primary reason for hospital admission (%)           | 90 (85.7)           | 318 (84.1)          | 0.044 | 90 (85.7)           | 84 (80.0)           | 0.152  |
| SAPS III Score, median (IQR)                                 | 56.00 (49.00-64.00) | 55.00 (49.00-64.00) | 0.033 | 56.00 (49.00-64.00) | 56.00 (48.00-68.00) | 0.055  |
| Time from symptom onset to ICU admission, days median (IQR)) | 8.00 (6.00-11.00)   | 8.82 (6.00-11.00)   | 0.095 | 8.00 (6.00-11.00)   | 8.82 (7.00-10.00)   | 0.057  |

---

IQR – interquartile range, DM – diabetes mellitus, COPD – chronic obstructive pulmonary disease, BMI – body mass index, HbA1c – glycated hemoglobin, SOFA – sequential organ failure assessment, SAPS – simplified acute physiology score, ICU – intensive care unit

**Supplemental Table 11** (Conditional) logistic regression analysis of the propensity matched cohort for hospital mortality

|                                           | Logistic Regression of unmatched cohort |         | Conditional logistic regression of propensity matched cohort |         |
|-------------------------------------------|-----------------------------------------|---------|--------------------------------------------------------------|---------|
|                                           | OR (95% CI)                             | P value | OR (95% CI)                                                  | P value |
| Period of Presentation (Ref: Second Wave) | 0.59 (0.35-0.96)                        | 0.037   | 0.66 (0.37-1.17)                                             | 0.152   |

OR – odds ratio, CI – confidence interval, Ref – reference category

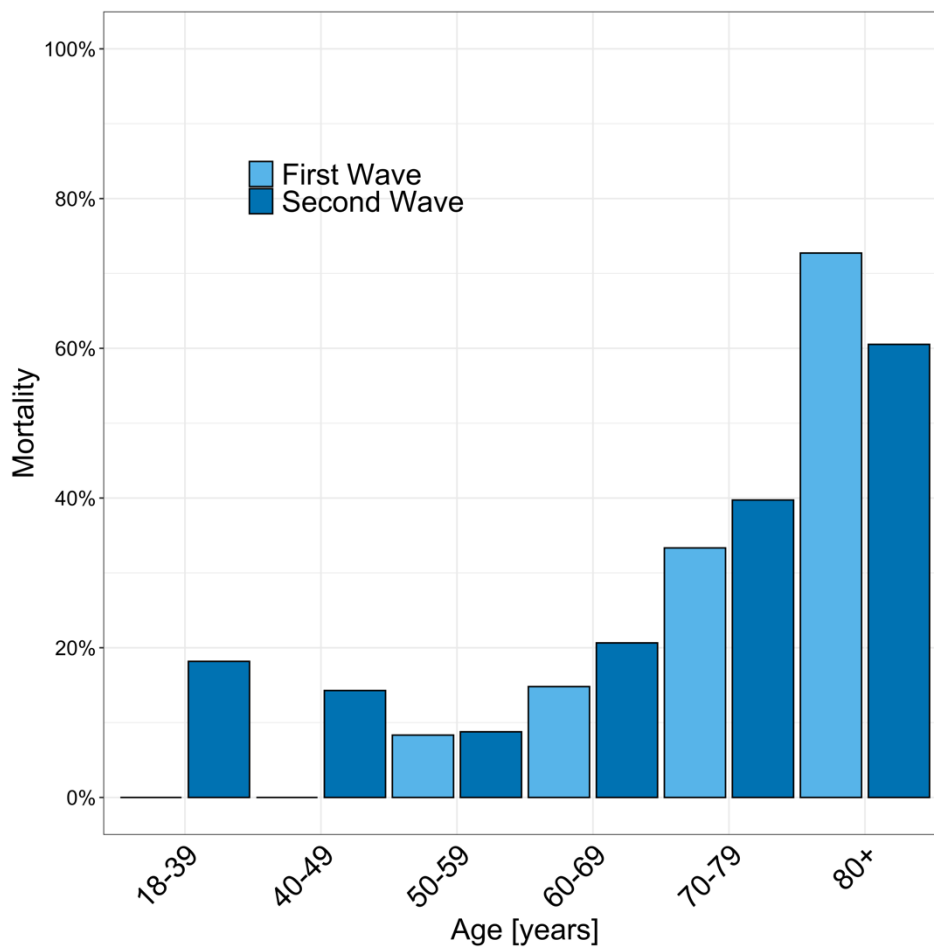

**Supplemental Figure 1:** Age and Hospital Mortality: hospital mortality in percent for different age groups in the first and second wave
